# Supplementary material for: Ternary Eu(iii) and Tb(iii) β-diketonate complexes containing chalcones: photophysical studies and biological outlook
Source: Royal Society of Chemistry journal article supplement (doi:10.1039/c7ra08543e), 2017-01-01
Supplement: c7ra08543e1.pdf [file c7ra08543e1.pdf]

## **Electronic Supplementary Information (ESI)**

### **Ternary Eu(III) and Tb(III) $\beta$ -diketonate Complexes Containing Chalcones: Photophysical Studies and Biological outlook**

*Zafar Abbas, Srikanth Dasari, Ashis K. Patra\**

Department of Chemistry, Indian Institute of Technology Kanpur, Kanpur 208016, Uttar Pradesh, India.

| <b><u>Table of Contents</u></b>                                                                                                                              | <b>Page No.</b> |
|--------------------------------------------------------------------------------------------------------------------------------------------------------------|-----------------|
| <b>Figure S1:</b> ESI Mass spectra showing isotopic distribution for (a) complex 1, (b) complex 2, (c) complex 3 and (d) complex 4.                          | <b>S5</b>       |
| <b>Figure S2:</b> UV-visible absorption spectra of the ligands in DMF.                                                                                       | <b>S6</b>       |
| <b>Figure S3:</b> Time delayed luminescence spectra of complexes 3 and 4.                                                                                    | <b>S7</b>       |
| <b>Figure S4:</b> Time-dependent UV-visible spectral changes of (a) complex 1, (b) complex 2, complex 3 and complex 4 in DMF.                                | <b>S8</b>       |
| <b>Figure S5:</b> Luminescence decay profile and lifetime measurement of complexes 1 (a), 2 (b), 3 (c) and 4 (d) in DMF                                      | <b>S9</b>       |
| <b>Figure S6:</b> . Luminescence decay profile and lifetime measurement of complexes 1 (a), 2 (b), 3 (c) and 4 (d) in H <sub>2</sub> O and D <sub>2</sub> O. | <b>S10</b>      |
| <b>Figure S7:</b> Unit cell packing diagram of complex 3.                                                                                                    | <b>S11</b>      |
| <b>Table S1:</b> Selected bond lengths (Å) and bond angles (deg) for [Eu(Pypp)(TTA) <sub>3</sub> ] (3).                                                      | <b>S12</b>      |
| <b>DNA Binding studies</b>                                                                                                                                   |                 |
| <b>Figure S8:</b> Absorption spectral traces of complex 2 in Tris-buffer with increasing the concentration of CT-DNA.                                        | <b>S13</b>      |
| <b>Figure S9:</b> Absorption spectral traces of complex 3 in Tris-buffer with increasing the concentration of CT-DNA.                                        | <b>S14</b>      |
| <b>Figure S10:</b> Absorption spectral traces of complex 4 in Tris-buffer with increasing the concentration of CT-DNA.                                       | <b>S15</b>      |
| <b>Figure S11:</b> Emission spectral traces of ethidium bromide bound CT-DNA with varying concentration of complex 2 in 5 mM Tris buffer.                    | <b>S16</b>      |
| <b>Figure S12:</b> Emission spectral traces of ethidium bromide bound CT-DNA with varying concentration of complex 3 in 5 mM Tris buffer.                    | <b>S17</b>      |
| <b>Figure S13:</b> Emission spectral traces of ethidium bromide bound CT-DNA with varying concentration of complex 4 in 5 mM Tris buffer.                    | <b>S18</b>      |
| <b>Serum Albumin Binding Studies</b>                                                                                                                         |                 |

**Figure S14:** Emission spectral traces of human serum albumin (HSA) protein in presence of increasing concentration of complex **2**. **S19**

**Figure S15:** Emission spectral traces of human serum albumin (HSA) protein in presence of increasing concentration of complex **3**. **S20**

**Figure S16:** Emission spectral traces of human serum albumin (HSA) protein in presence of increasing concentration of complex **4**. **S21**

#### **Synchronous Emission Studies**

**Figure S17:** Synchronous emission spectral traces of human serum albumin (HSA) with increasing concentration of complex **2** at **(a)**  $\Delta\lambda = 60$  nm **(b)**  $\Delta\lambda = 15$  nm. **S22**

**Figure S18:** Synchronous emission spectral traces of human serum albumin (HSA) with increasing concentration of complex **3** at **(a)**  $\Delta\lambda = 60$  nm **(b)**  $\Delta\lambda = 15$  nm. **S23**

**Figure S19:** Synchronous emission spectral traces of human serum albumin (HSA) with increasing concentration of complex **4** at **(a)**  $\Delta\lambda = 60$  nm **(b)**  $\Delta\lambda = 15$  nm. **S24**

#### **DNA Photocleavage studies**

**Figure S20:** Gel electrophoresis diagram showing photocleavage of SC pUC19 DNA with complexes **1** and **3** on irradiation with UV-A light of 365 nm with varying exposure time. **S25**

**Figure S21:** Gel electrophoresis diagram showing photocleavage of SC pUC19 DNA with complexes **2** and **4** on irradiation with UV-A light of 365 nm with varying exposure time. **S26**

**Figure S22:** Gel electrophoresis diagram showing photocleavage of SC pUC19 DNA by complexes **1** in presence of various additives. **S27**

**Figure S23:** Gel electrophoresis diagram showing photocleavage of SC **S29**

pUC19 DNA by complexes **2** in presence of various additives.

**Figure S24:** Gel electrophoresis diagram showing photocleavage of SC pUC19 DNA by complexes **3** in presence of various additives.

**S29**

**Figure S25:** Gel electrophoresis diagram showing photocleavage of SC pUC19 DNA by complexes **4** in presence of various additives.

**S30**

**Figure S26:** Bar diagram showing photocleavage of SC pUC19 DNA by complexes **2** and **4** in presence of various additives.

**S31**

**Figure S27:** Time delayed luminescence spectra of Complex **1** with increasing concentration of CT-DNA

**S32**

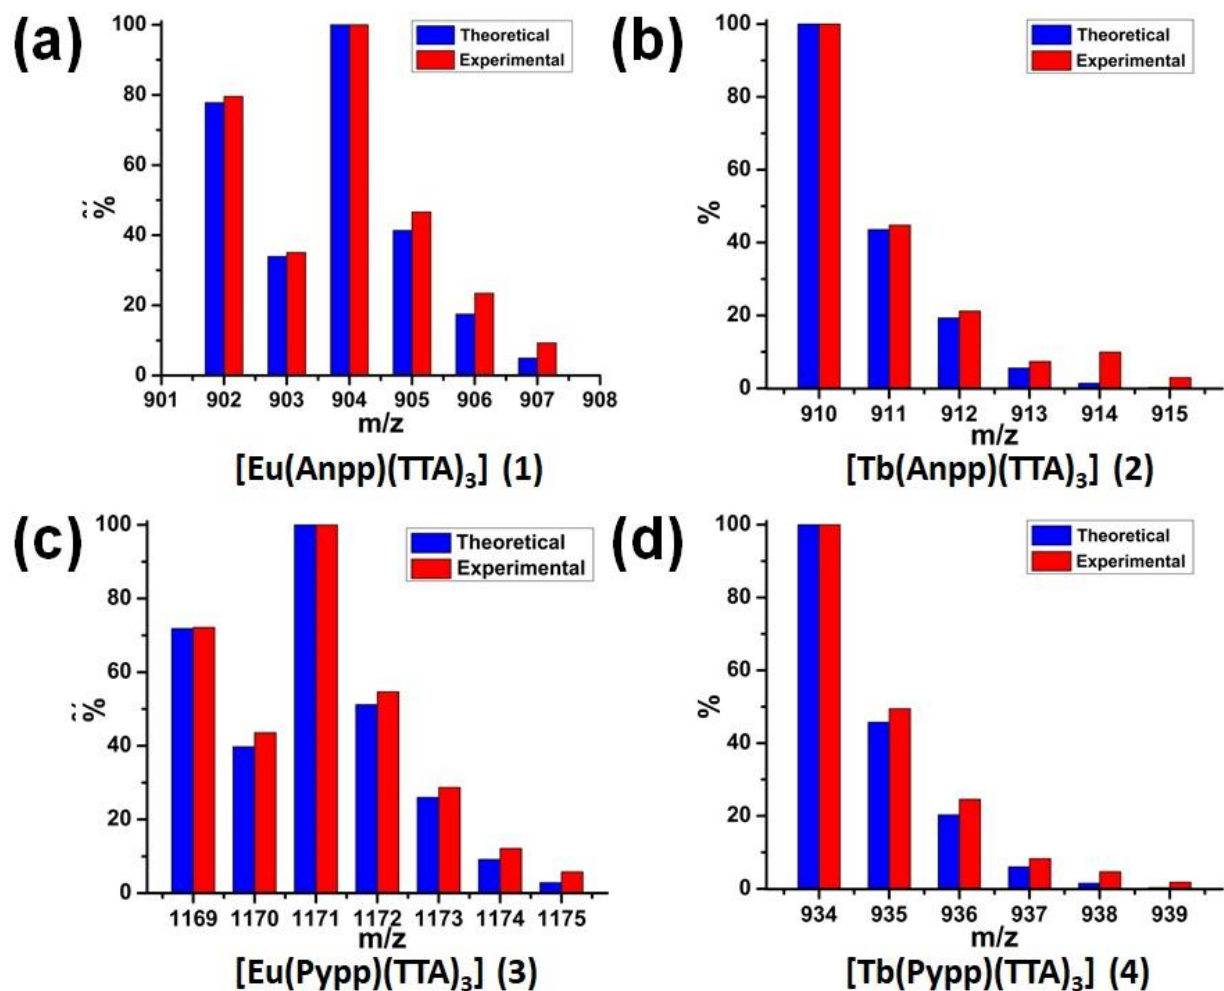

**Figure S1.** ESI-MS spectra with isotopic distribution for the parent ion peak of (a) Complex 1, (b) Complex 2, (c) Complex 3 and (d) Complex 4 in DMF.

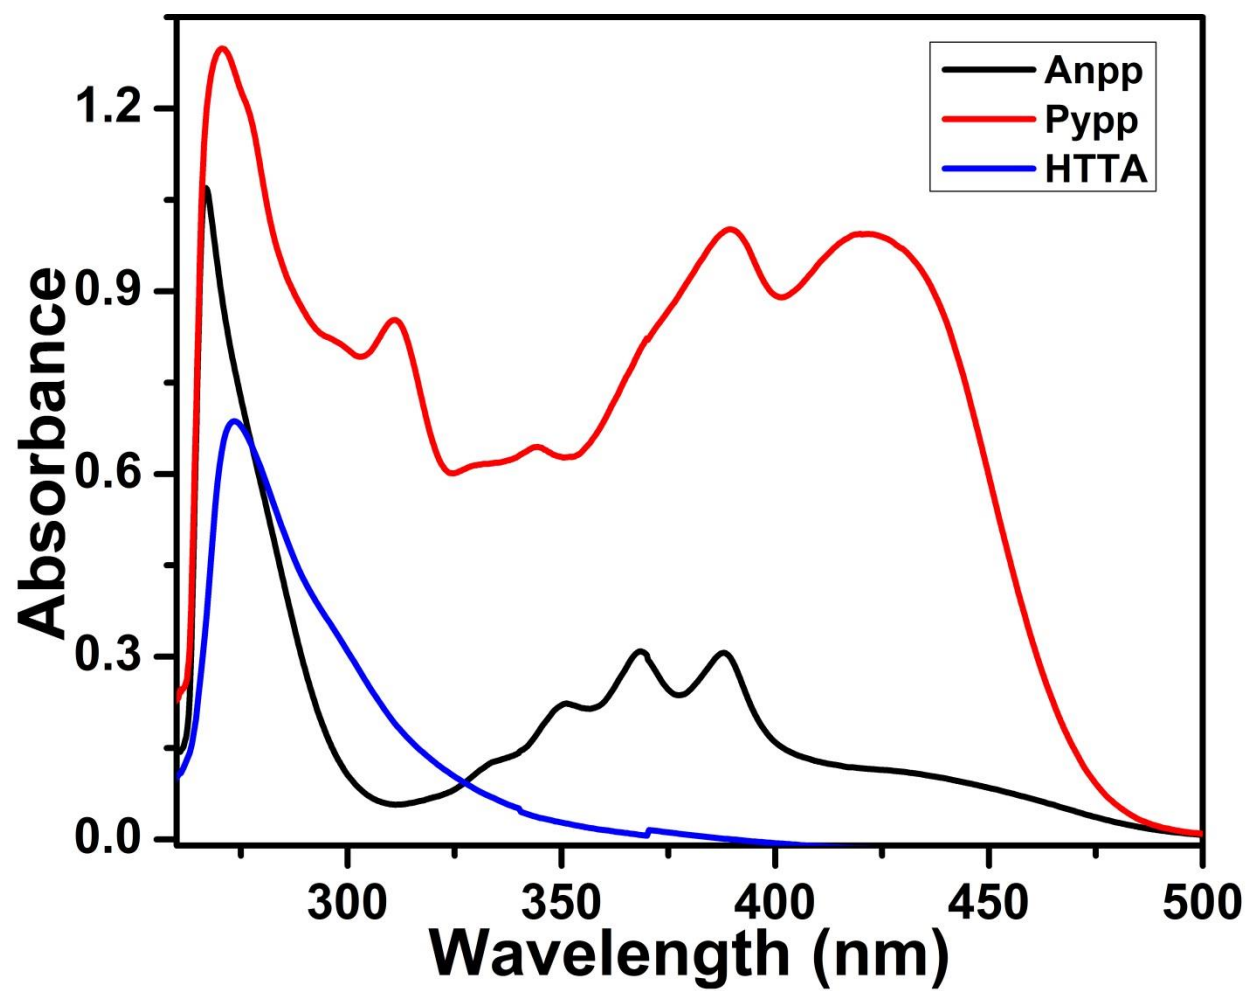

**Figure S2.** UV-Vis absorption spectral traces of chalcones and TTA ligands in DMF at 298 K.

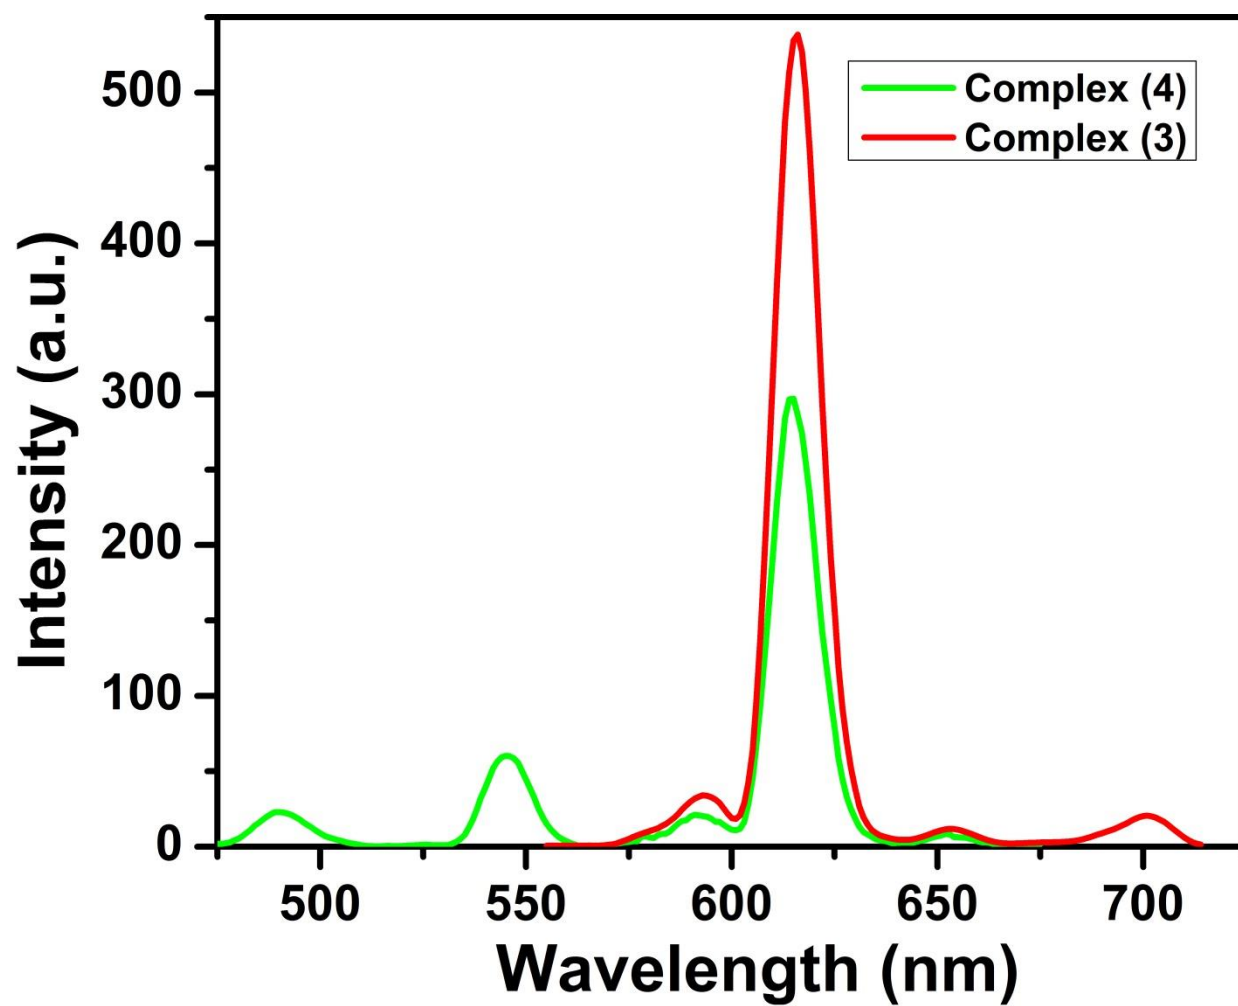

**Figure S3.** Time-delayed luminescence spectra for complexes **3** and **4** (20  $\mu$ M each) in DMF at 298 K [delay time = 0.1 ms, gate time = 0.1 ms,  $\lambda_{\text{ex}}$  = 340 nm, slit width = 10 nm].

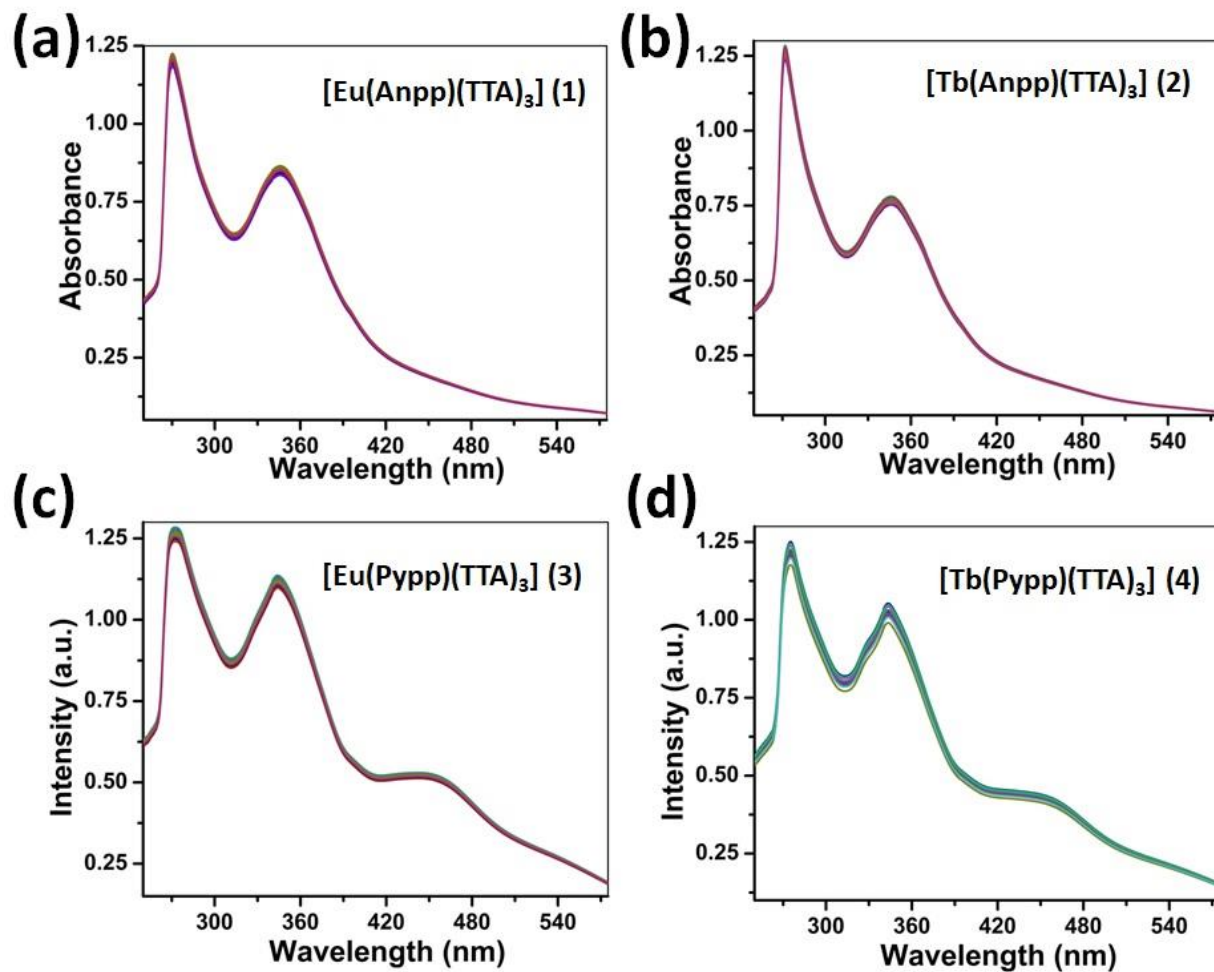

**Figure S4.** Time-dependent absorption spectral traces of (a) complex **1**, (b) Complex **2**, Complex **3** and Complex **4** recorded for 4 h in DMF at 298 K to access the stability of the complexes in solution.



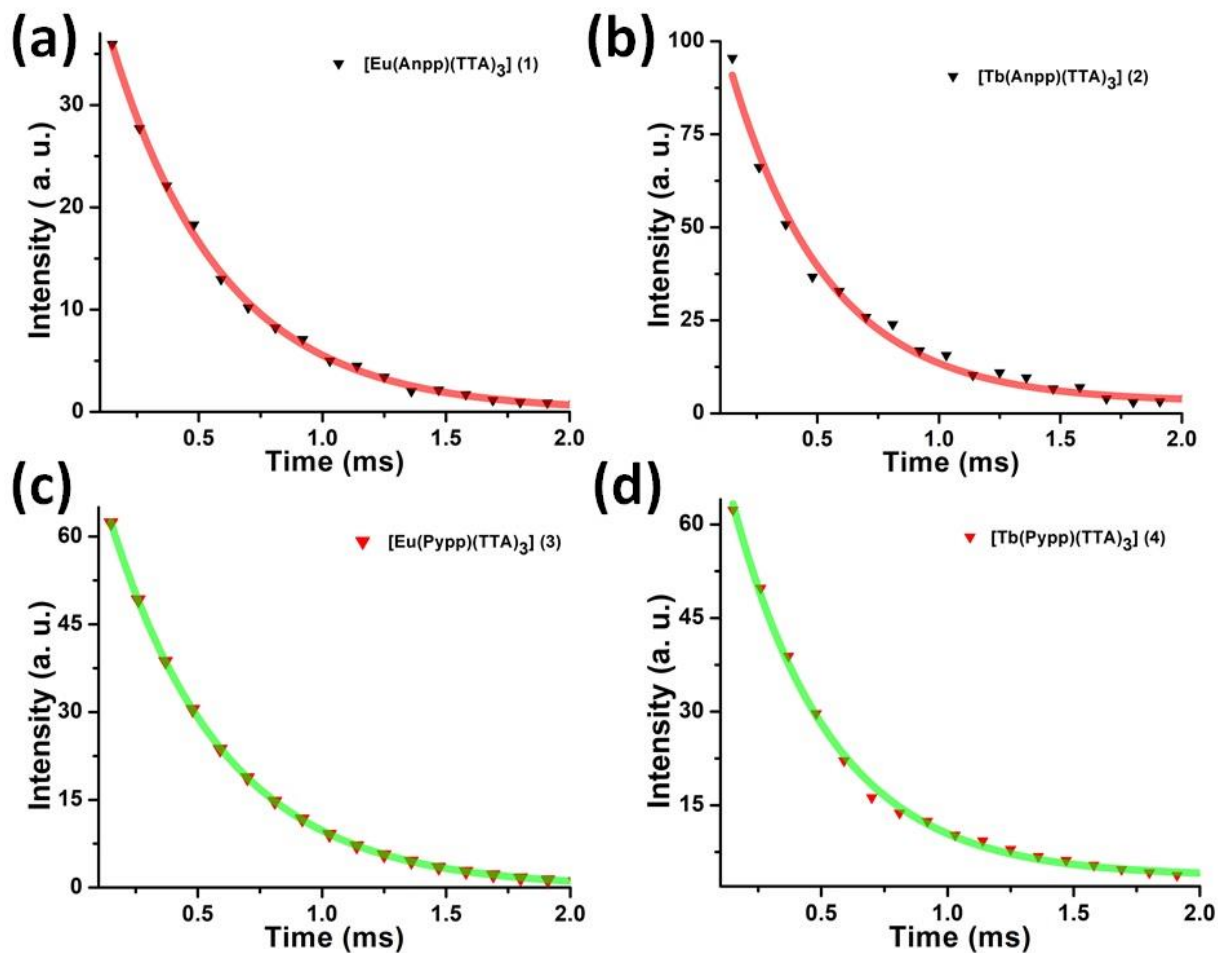

**Figure S5.** Luminescence decay profile from  $^5D_0$  and  $^5D_4$  states and lifetime measurement at 616 nm and 545 nm for  $\text{Eu}^{3+}$  and  $\text{Tb}^{3+}$  in complexes **1** (a), **2** (b), **3** (c) and **4** (d) respectively in DMF under ambient condition at 298 K.  $\lambda_{\text{ex}} = 340$  nm, delay time and gate time = 0.1 ms, total decay time = 3.0 ms, slit width = 10 nm.

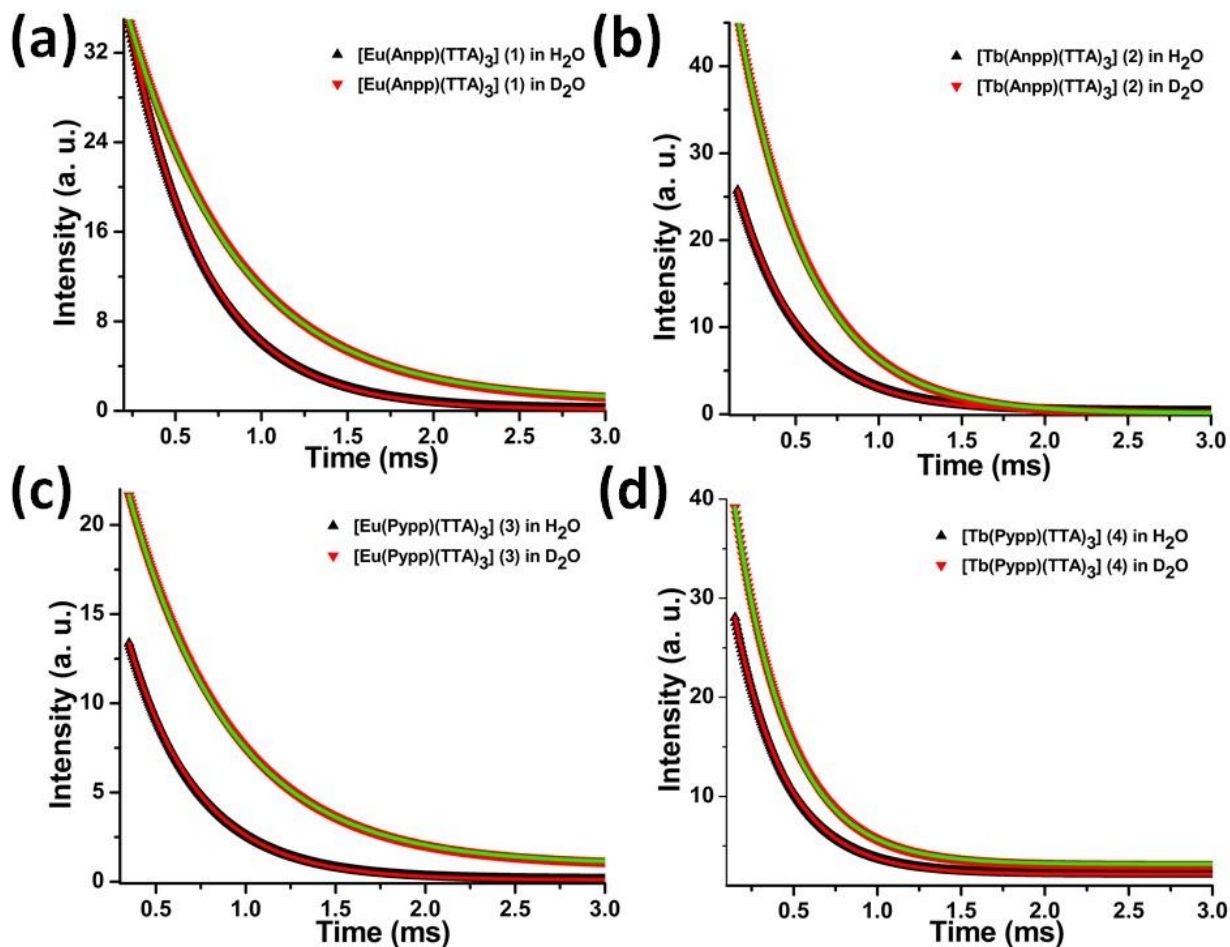

**Figure S6.** Luminescence lifetime measurements from the decay profile of  $^5D_0$  and  $^5D_4$  excited states at 616 nm and 545 nm for complexes **1** (a), **2** (b), **3** (c) and **4** (d) respectively in  $H_2O$  and  $D_2O$  under ambient condition at 298 K. The solid lines are mono exponential fittings in  $H_2O$  and  $D_2O$  respectively.  $\lambda_{ex} = 340$  nm, delay time = 0.1 ms and gate time = 0.1 ms, slit width = 10 nm, total decay time = 3 ms.

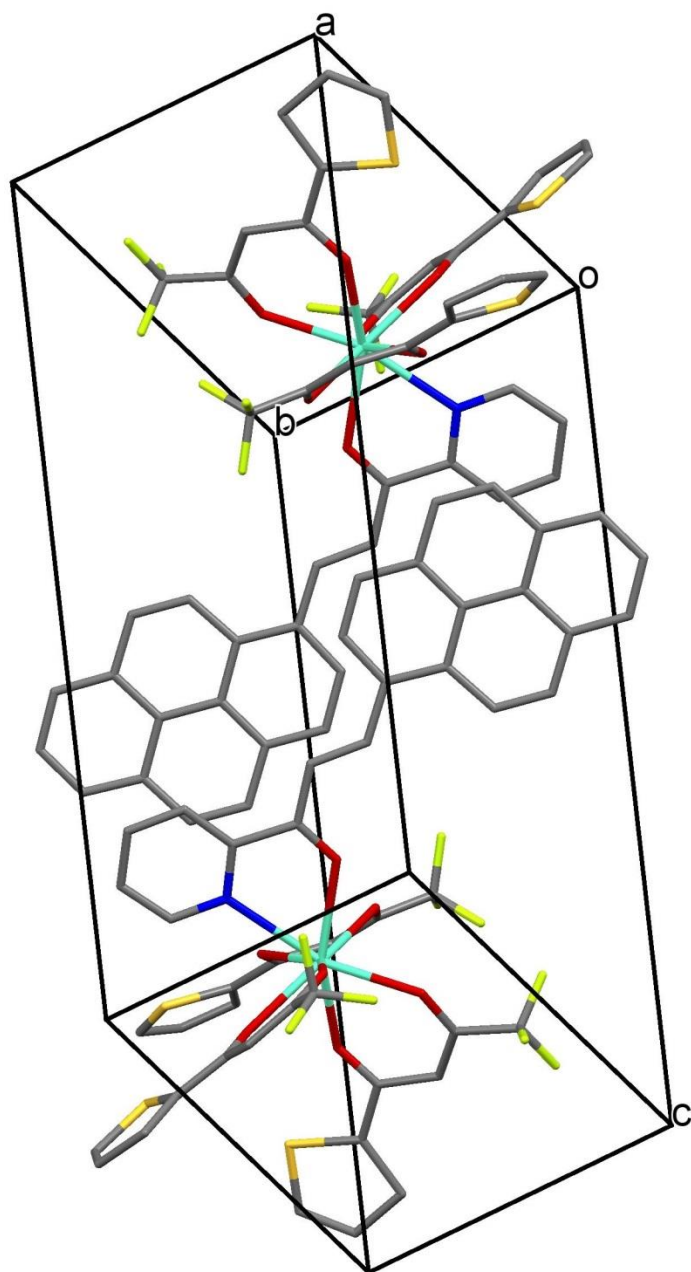

**Figure S7.** Unit cell packing diagram of complex **3** viewed along b-axis.

**Table S1:** Selected bond lengths (Å) and bond angles (deg) for [Eu(Pypp)(TTA)<sub>3</sub>] (**3**).

| <b>Bond length (Å)</b>  |            |
|-------------------------|------------|
| Eu(1)-N(1)              | 2.608(6)   |
| Eu(1)-O(1)              | 2.453(5)   |
| Eu(1)-O(2)              | 2.356(6)   |
| Eu(1)-O(3)              | 2.357(5)   |
| Eu(1)-O(4)              | 2.375(6)   |
| Eu(1)-O(5)              | 2.360(5)   |
| Eu(1)-O(6)              | 2.357(5)   |
| Eu(1)-O(7)              | 2.349(5)   |
| <b>Bond angle (deg)</b> |            |
| O(1)-Eu(1)-N(1)         | 62.43(18)  |
| O(2)-Eu(1)-N(1)         | 81.4(2)    |
| O(3)-Eu(1)-N(1)         | 74.44(19)  |
| O(4)-Eu(1)-N(1)         | 154.2(2)   |
| O(5)-Eu(1)-N(1)         | 133.86(19) |
| O(6)-Eu(1)-N(1)         | 107.94(19) |
| O(7)-Eu(1)-N(1)         | 72.06(19)  |
| O(2)-Eu(1)-O(1)         | 76.34(18)  |
| O(3)-Eu(1)-O(1)         | 129.02(18) |
| O(4)-Eu(1)-O(1)         | 95.94(19)  |
| O(5)-Eu(1)-O(1)         | 158.25(19) |
| O(6)-Eu(1)-O(1)         | 72.44(18)  |
| O(7)-Eu(1)-O(1)         | 107.64(18) |
| O(3)-Eu(1)-O(2)         | 71.36(18)  |
| O(4)-Eu(1)-O(2)         | 79.7(2)    |
| O(5)-Eu(1)-O(2)         | 116.6(2)   |
| O(6)-Eu(1)-O(2)         | 137.44(19) |
| O(7)-Eu(1)-O(2)         | 146.39(19) |
| O(4)-Eu(1)-O(3)         | 115.29(19) |
| O(5)-Eu(1)-O(3)         | 72.73(19)  |
| O(6)-Eu(1)-O(3)         | 151.04(19) |
| O(7)-Eu(1)-O(3)         | 81.72(19)  |
| O(5)-Eu(1)-O(4)         | 71.02(19)  |
| O(6)-Eu(1)-O(4)         | 75.6(2)    |
| O(7)-Eu(1)-O(4)         | 131.3(2)   |
| O(6)-Eu(1)-O(5)         | 87.18(19)  |
| O(7)-Eu(1)-O(5)         | 71.90(19)  |
| O(7)-Eu(1)-O(6)         | 72.15(19)  |

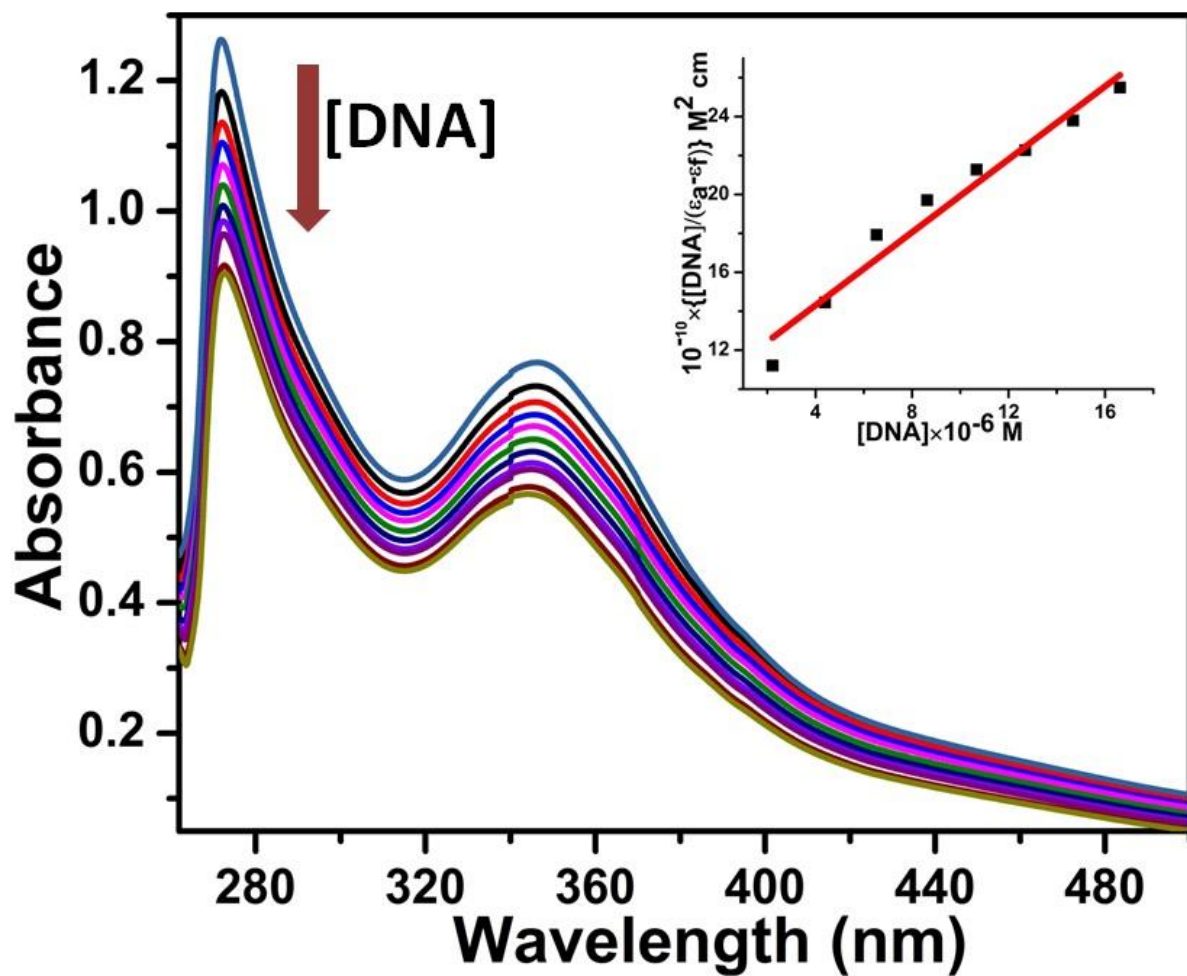

**Figure S8.** UV/Vis traces for complex **2** (20  $\mu\text{M}$ ) in 5 mM Tris buffer (pH 7.2) with increasing [CT-DNA] at 298 K; Inset:  $[\text{DNA}]/\Delta\epsilon_{\text{af}}$  versus  $[\text{DNA}]$  plot for complex **2**.

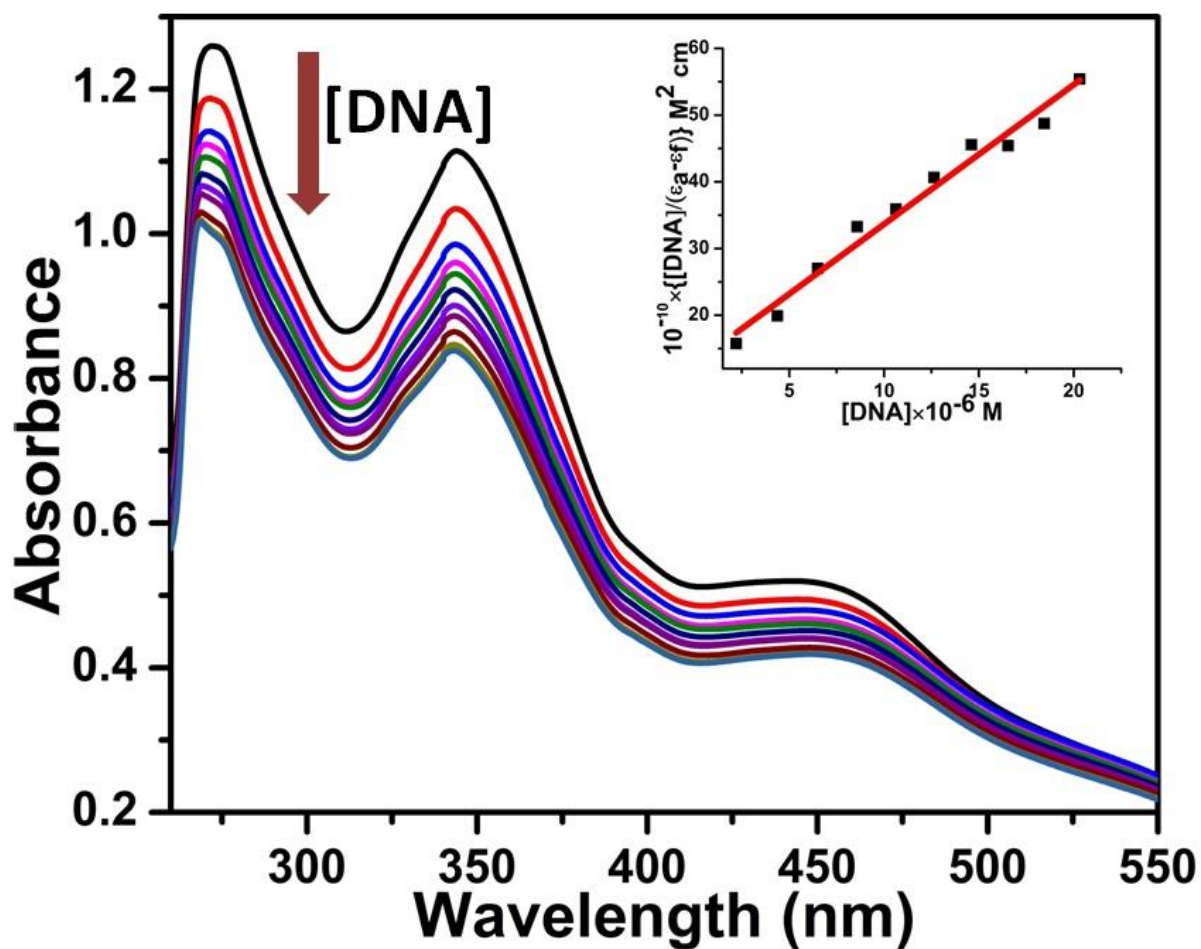

**Figure S9.** UV/Vis traces for complex **3** (20  $\mu\text{M}$ ) in 5 mM Tris buffer (pH 7.2) with increasing [CT-DNA] at 298 K; Inset:  $[\text{DNA}] / \Delta\epsilon_{\text{af}}$  versus  $[\text{DNA}]$  plot for complex **3**.

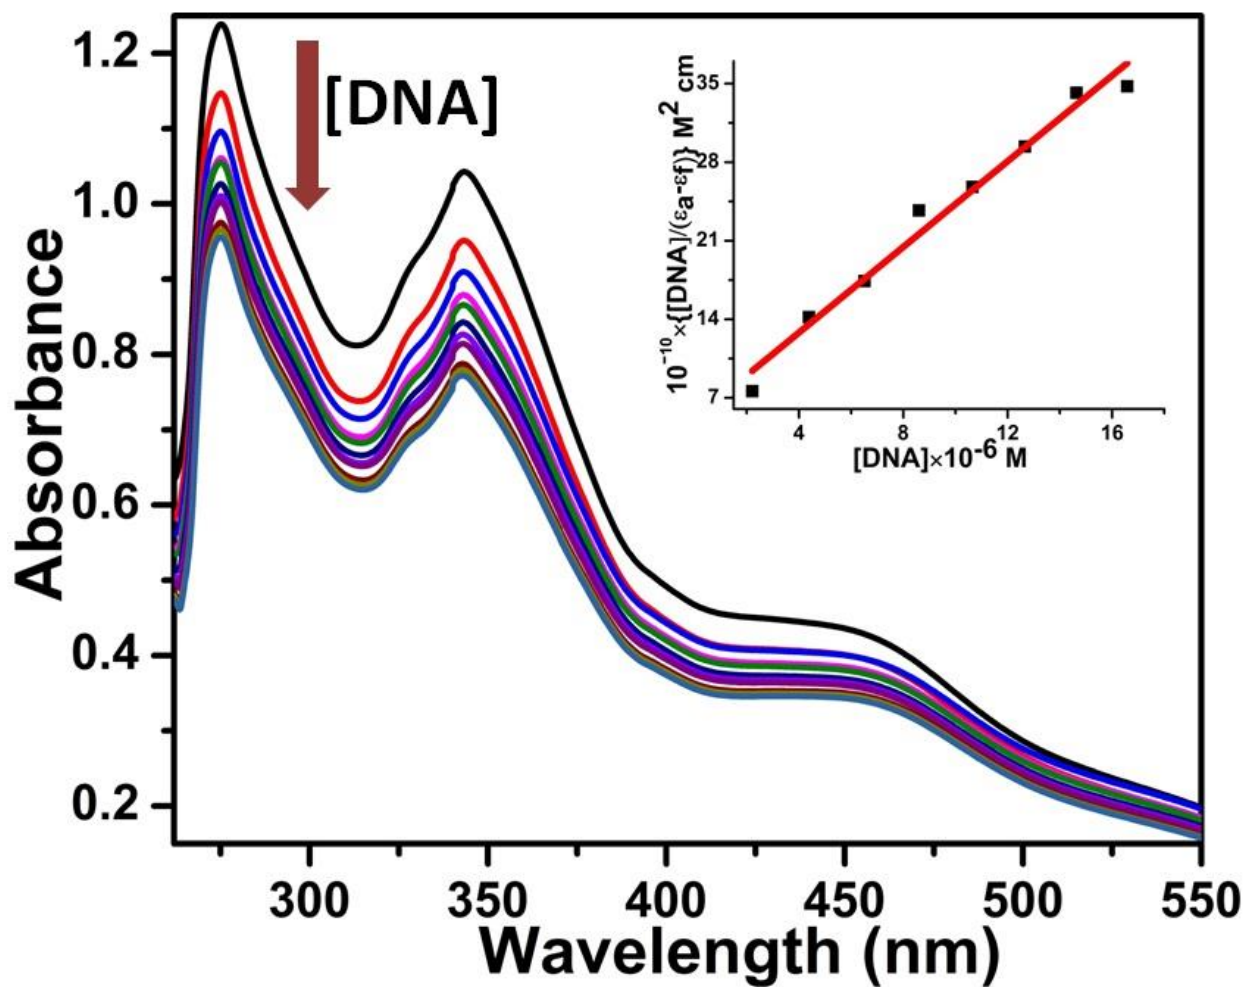

**Figure S10.** UV/Vis traces for complex **4** (20  $\mu\text{M}$ ) in 5 mM Tris buffer (pH 7.2) with increasing [CT-DNA] at 298 K; Inset:  $[\text{DNA}]/\Delta\epsilon_{\text{af}}$  versus  $[\text{DNA}]$  plot for complex **4**.



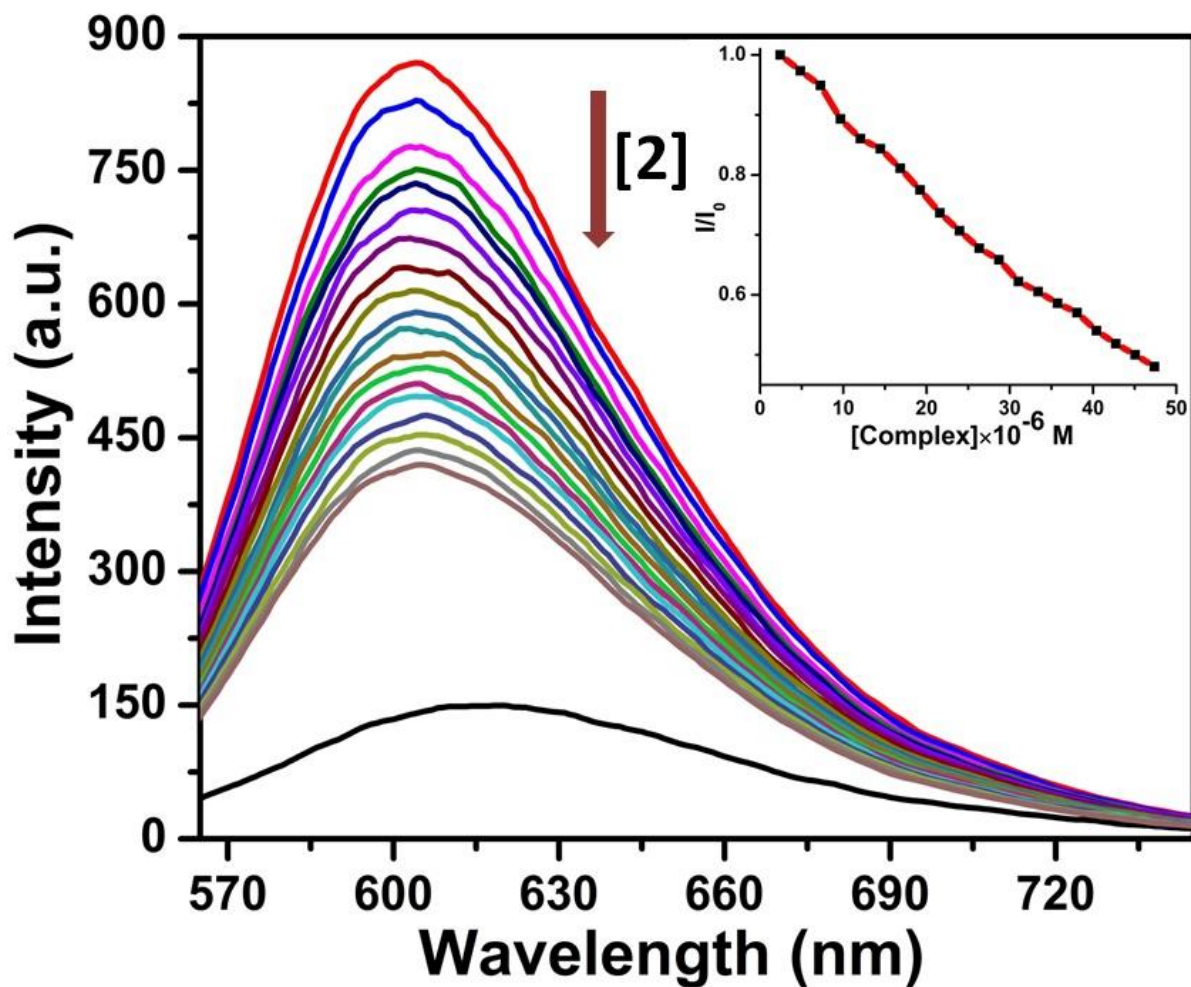

**Figure S11.** Emission spectral traces for EB-bound CT-DNA with increasing concentration of complex **2** in 5 mM Tris buffer (pH 7.2) at 298 K;  $\lambda_{ex} = 546$  nm,  $\lambda_{em} = 603$  nm, [DNA] = 212  $\mu M$ , [EB] = 12  $\mu M$ ; Inset: a plot of  $I/I_0$  versus [complex **2**].



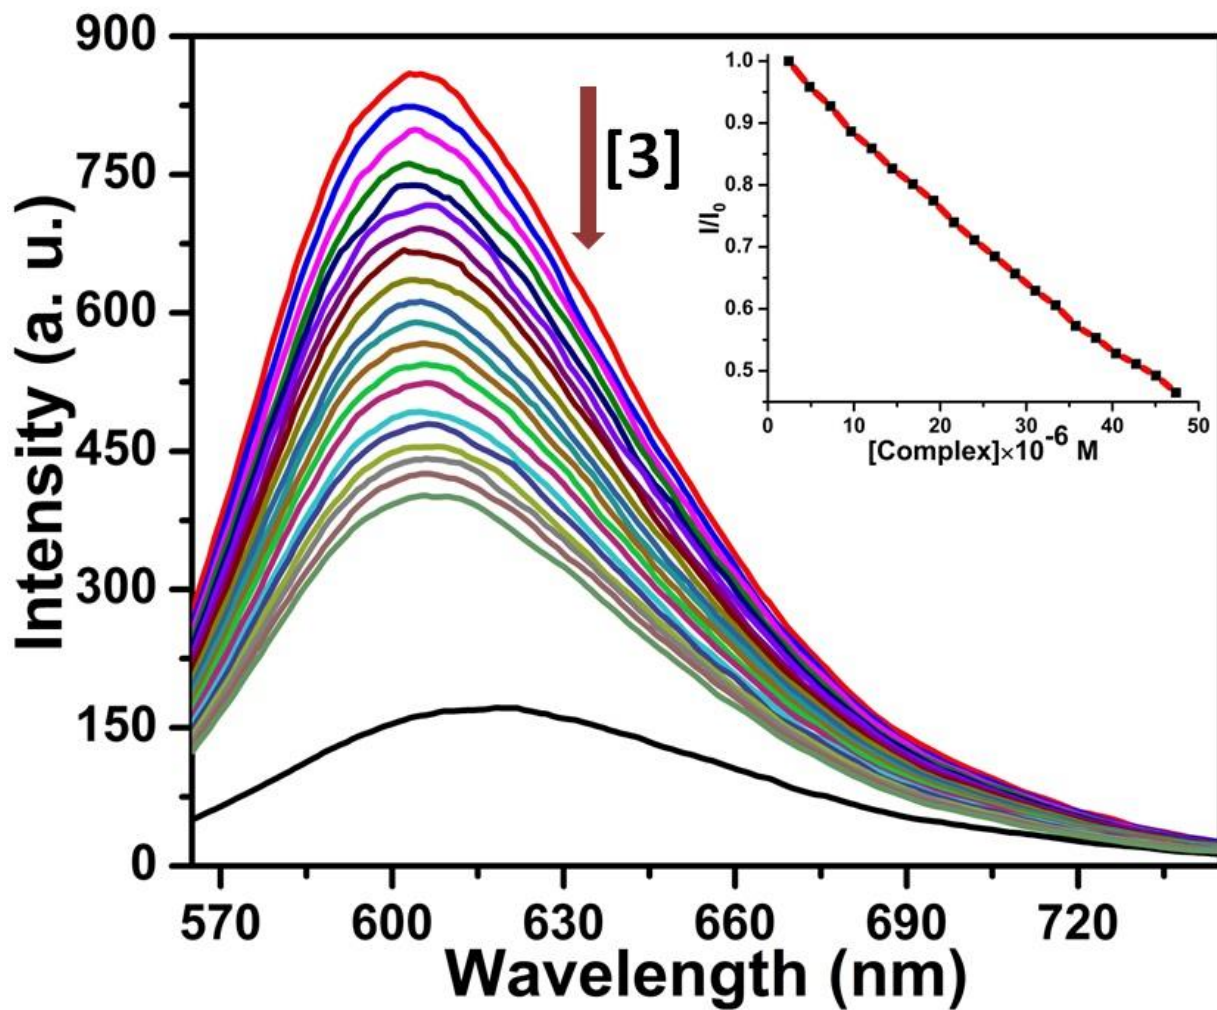

**Figure S12.** Emission spectral traces for EB-bound CT-DNA with increasing concentration of complex **3** in 5 mM Tris buffer (pH 7.2) at 298 K;  $\lambda_{ex} = 546$  nm,  $\lambda_{em} = 603$  nm,  $[DNA] = 212 \mu M$ ,  $[EB] = 12 \mu M$ ; Inset: a plot of  $I/I_0$  versus  $[complex \ 3]$ .

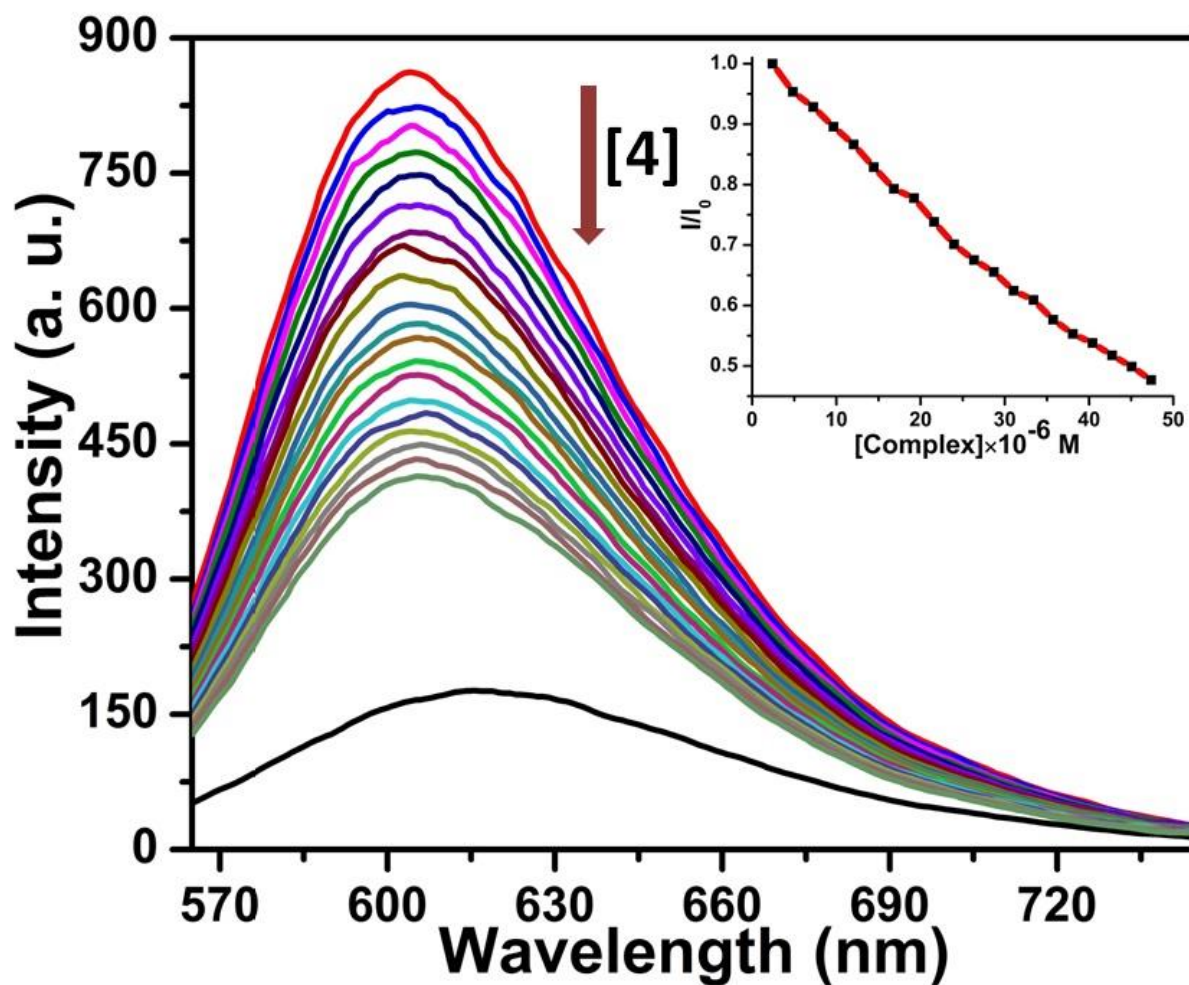

**Figure S13.** Emission spectral traces for EB-bound CT-DNA with increasing concentration of complex **4** in 5 mM Tris buffer (pH 7.2) at 298 K;  $\lambda_{ex} = 546$  nm,  $\lambda_{em} = 603$  nm,  $[DNA] = 212 \mu M$ ,  $[EB] = 12 \mu M$ ; Inset: a plot of  $I/I_0$  versus [complex **4**].

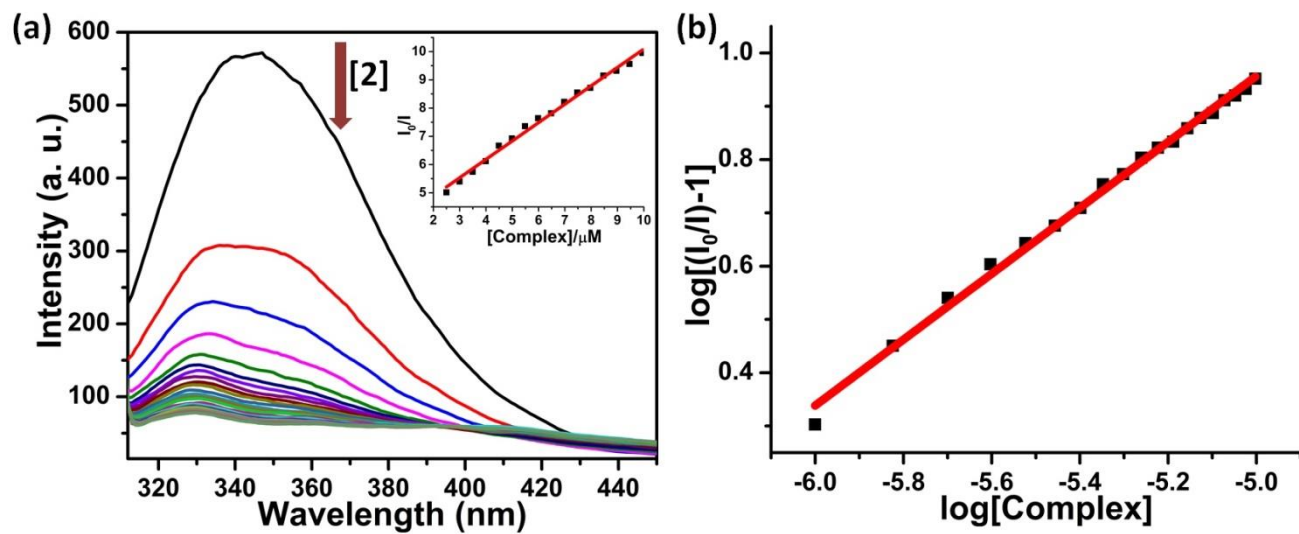

**Figure S14.** (a) The emission quenching of HSA addition of complex **2** in 5 mM Tris buffer (pH 7.2) at 298 K; Inset: a plot of  $I_0/I$  versus  $[complex]$  for **2**;  $\lambda_{ex} = 295$  nm,  $\lambda_{em} = 345$  nm,  $[HSA] = 5 \mu M$ . (b) Scatchard plot:  $\log[(I_0-I)/I]$  vs.  $\log[Complex]$  for HSA in the presence of complex **2**.

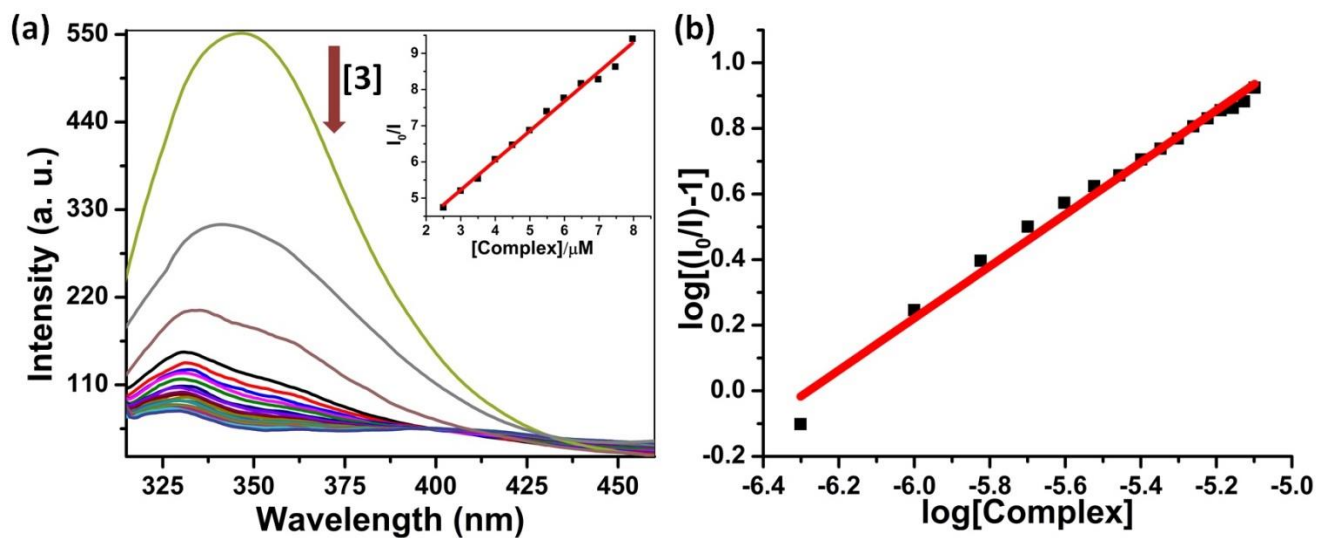

**Figure S15.** (a) The emission quenching of HSA addition of complex **3** in 5 mM Tris buffer (pH 7.2) at 298 K; Inset: a plot of  $I_0/I$  versus [complex] for **3**;  $\lambda_{\text{ex}} = 295$  nm,  $\lambda_{\text{em}} = 345$  nm, [HSA] = 5  $\mu\text{M}$ . (b) Scatchard plot:  $\log[(I_0-I)/I]$  vs.  $\log[\text{Complex}]$  for HSA in the presence of complex **3**.

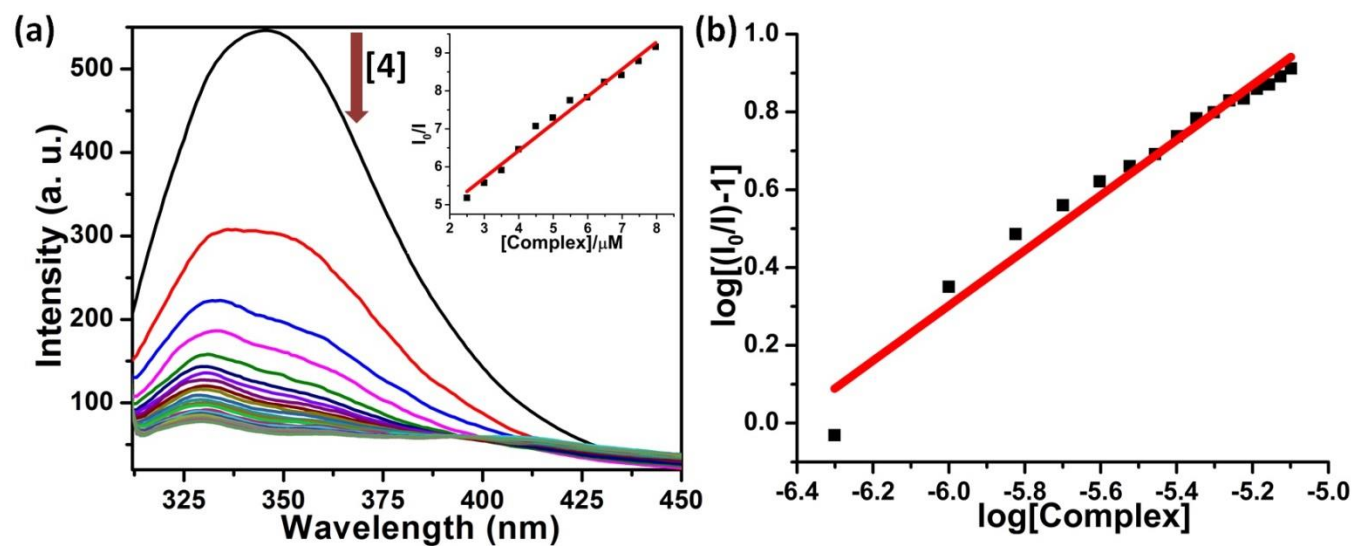

**Figure S16.** (a) The emission quenching of HSA addition of complex **4** in 5 mM Tris buffer (pH 7.2) at 298 K; Inset: a plot of  $I_0/I$  versus  $[complex]$  for **4**;  $\lambda_{ex} = 295$  nm,  $\lambda_{em} = 345$  nm,  $[HSA] = 5$   $\mu M$ . (b) Scatchard plot:  $\log[(I_0-I)/I]$  vs.  $\log[Complex]$  for HSA in the presence of complex **4**.

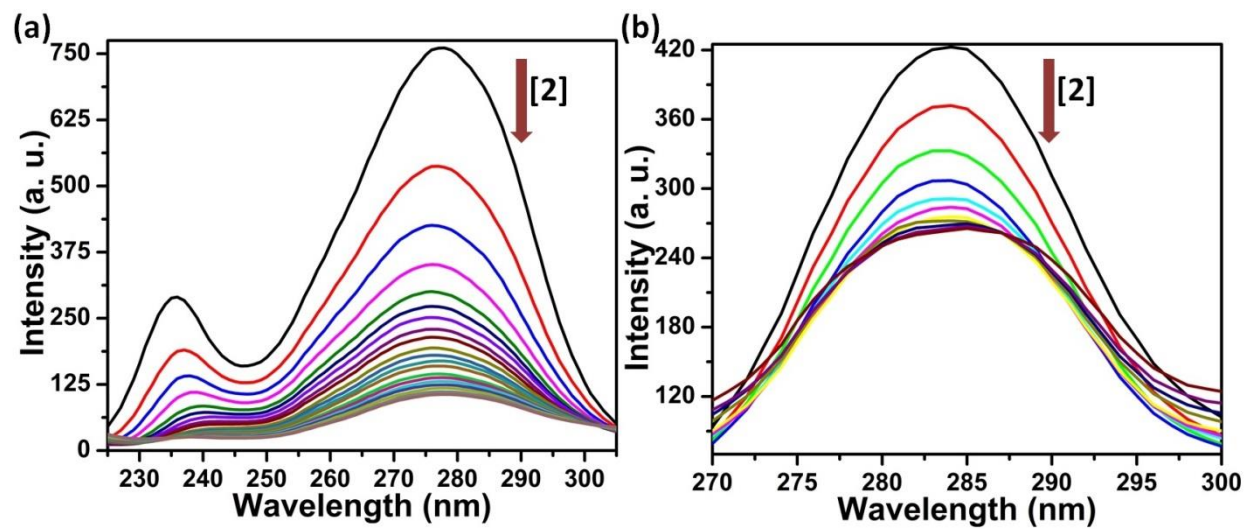

**Figure S17.** Synchronous emission spectra of HSA (5  $\mu\text{M}$ ) showing effect of increasing concentration of complex **2** (a) with  $\Delta\lambda = 60$  nm and (b) with  $\Delta\lambda = 15$  nm at 298 K in Tris buffer (pH = 7.2).

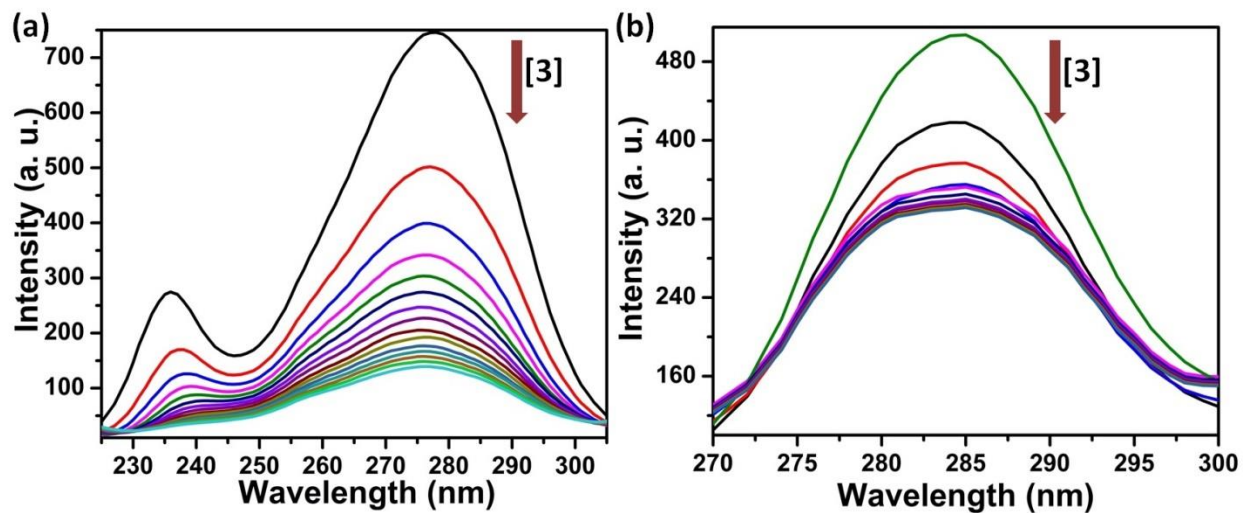

**Figure S18.** Synchronous emission spectra of HSA (5  $\mu\text{M}$ ) showing effect of increasing concentration of complex **3** (a) with  $\Delta\lambda = 60$  nm and (b) with  $\Delta\lambda = 15$  nm at 298 K in Tris buffer (pH = 7.2).



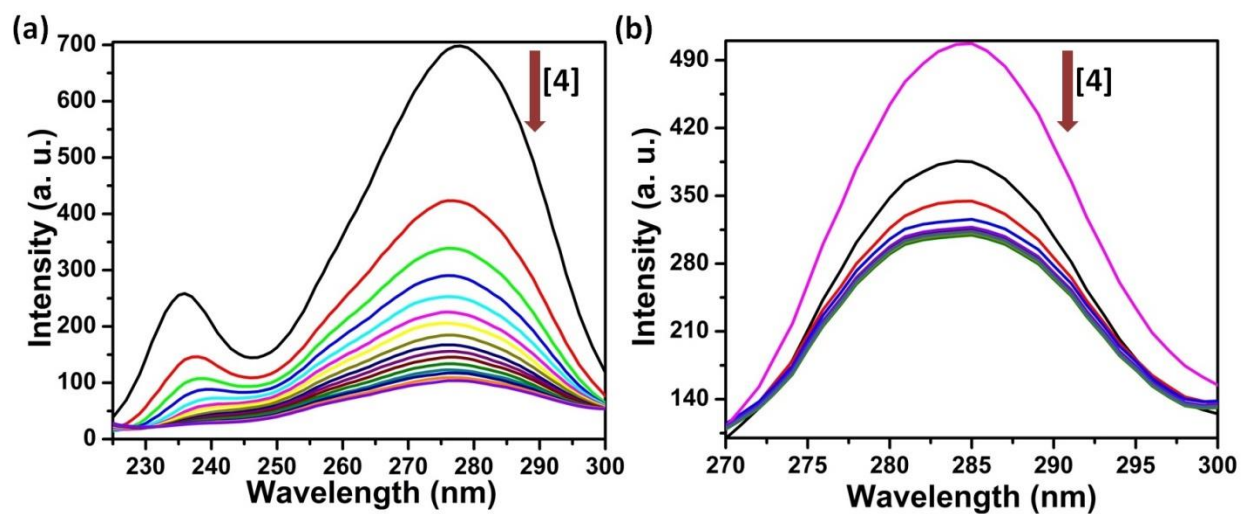

**Figure S19.** Synchronous emission spectra of HSA (5  $\mu\text{M}$ ) showing effect of increasing concentration of complex **4** (a) with  $\Delta\lambda = 60$  nm and (b) with  $\Delta\lambda = 15$  nm at 298 K in Tris buffer (pH = 7.2).



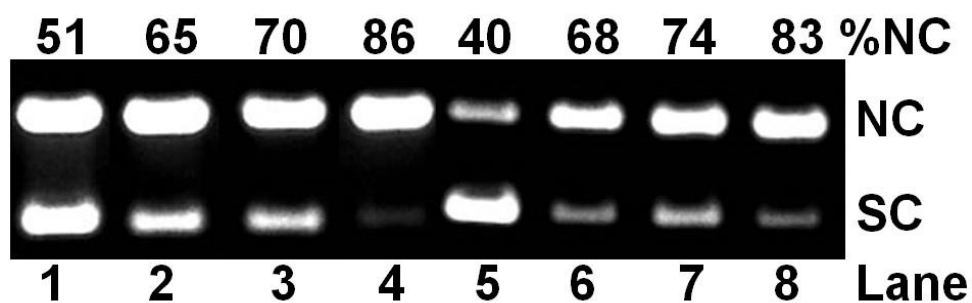

**Figure S20.** Gel electrophoresis diagram showing the cleavage of SC pUC19 DNA (30  $\mu$ M, 0.2  $\mu$ g) incubated with complexes **1** and **2** (60  $\mu$ M) in 50 mM Tris-HCl/NaCl buffer (pH, 7.2) at 37  $^{\circ}$ C for 1.5 h on irradiation with UV-A light of 365 nm (6 W) for various exposure time. Detailed conditions are given below in a tabular form.

| Lane No. | Reaction Condition | $\lambda$ /nm | Exposure time (t/min) | %NC |
|----------|--------------------|---------------|-----------------------|-----|
| 1        | DNA+ <b>1</b>      | 365           | 30                    | 51  |
| 2        | DNA+ <b>1</b>      | 365           | 60                    | 65  |
| 3        | DNA+ <b>1</b>      | 365           | 90                    | 70  |
| 4        | DNA+ <b>1</b>      | 365           | 120                   | 86  |
| 5        | DNA+ <b>2</b>      | 365           | 30                    | 40  |
| 6        | DNA+ <b>2</b>      | 365           | 60                    | 68  |
| 7        | DNA+ <b>2</b>      | 365           | 90                    | 74  |
| 8        | DNA+ <b>2</b>      | 365           | 120                   | 83  |

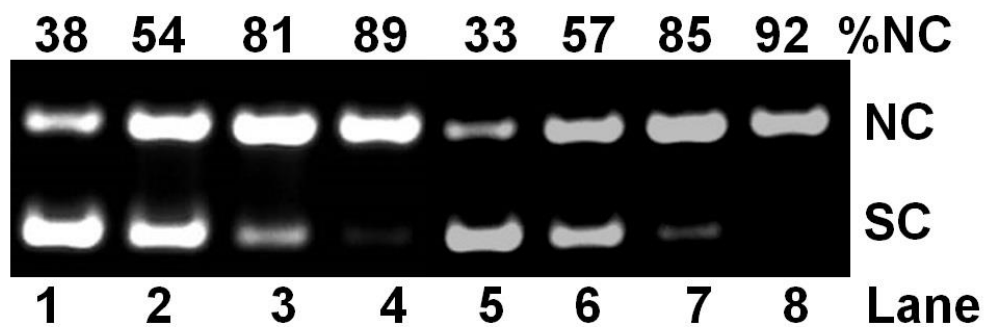

**Figure S21.** Gel electrophoresis diagram showing the cleavage of SC pUC19 DNA (30  $\mu$ M, 0.2  $\mu$ g) incubated with complexes **3** and **4** (60  $\mu$ M) in 50 mM Tris-HCl/NaCl buffer (pH, 7.2) at 37  $^{\circ}$ C for 1 h on irradiation with UV-A light of 365 nm (6 W) for various exposure time. Detailed conditions are given below in a tabular form.

| Lane No. | Reaction Condition | $\lambda$ /nm | Exposure time (t/min) | %NC |
|----------|--------------------|---------------|-----------------------|-----|
| 1        | DNA+ <b>3</b>      | 365           | 30                    | 38  |
| 2        | DNA+ <b>3</b>      | 365           | 60                    | 54  |
| 3        | DNA+ <b>3</b>      | 365           | 90                    | 81  |
| 4        | DNA+ <b>3</b>      | 365           | 120                   | 89  |
| 5        | DNA+ <b>4</b>      | 365           | 30                    | 33  |
| 6        | DNA+ <b>4</b>      | 365           | 60                    | 57  |
| 7        | DNA+ <b>4</b>      | 365           | 90                    | 85  |
| 8        | DNA+ <b>4</b>      | 365           | 120                   | 92  |

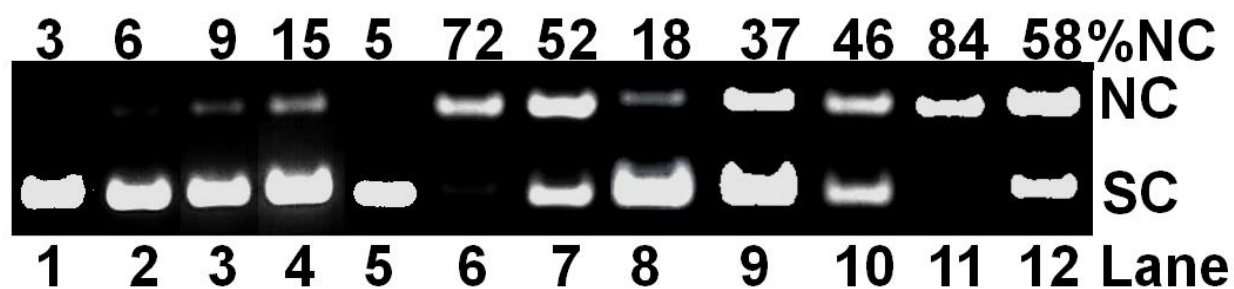

**Figure S22.** Gel electrophoresis diagram showing the cleavage of SC pUC19 DNA ( $30 \mu\text{M}$ ,  $0.20 \mu\text{g } \mu\text{L}^{-1}$ ) incubated with complexes **1** and controls in 50 mM Tris-HCl/NaCl buffer (pH, 7.2) at  $37^\circ\text{C}$  for 2 h on irradiation with UV-A light of 365 nm (6 W) for 1 h: lane 1, DNA control; lane 2, DNA + HTTA ( $60 \mu\text{M}$ ); lane 3, DNA + Anpp ( $60 \mu\text{M}$ ); lane 4, DNA + Pypp ( $60 \mu\text{M}$ ); lane 5,  $\text{EuCl}_3 \cdot x\text{H}_2\text{O}$  control ( $60 \mu\text{M}$ ); lane 6, DNA + **1** ( $60 \mu\text{M}$ ); Lane 7, DNA + **1** ( $60 \mu\text{M}$ ) + DMSO ( $4 \mu\text{L}$ ); Lane 8, DNA + **1** ( $60 \mu\text{M}$ ) + KI ( $400 \mu\text{M}$ ); Lane 9, DNA + **1** ( $60 \mu\text{M}$ ) +  $\text{NaN}_3$  ( $400 \mu\text{M}$ ); Lane 10, DNA + **1** ( $60 \mu\text{M}$ ) + L-Histidine ( $400 \mu\text{M}$ ); Lane 11, DNA + **1** ( $60 \mu\text{M}$ ) +  $\text{D}_2\text{O}$  ( $16 \mu\text{L}$ ); Lane 12, DNA + catalase (4 unit) + **1** ( $60 \mu\text{M}$ ).

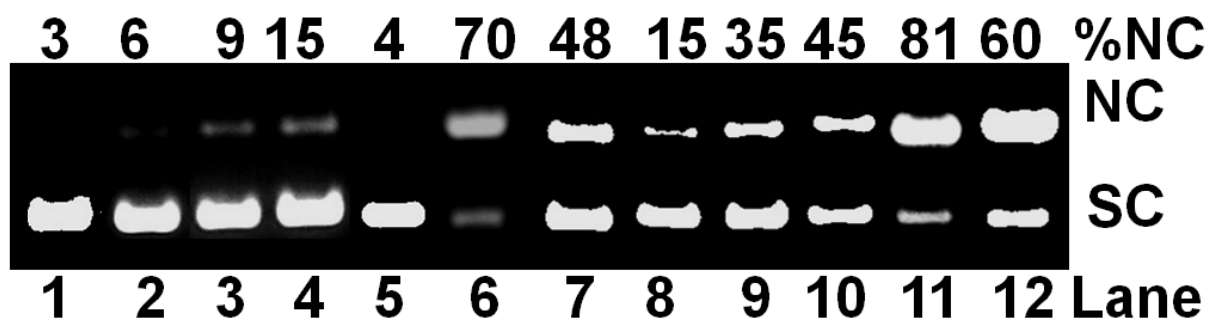

**Figure S23.** Gel electrophoresis diagram showing the cleavage of SC pUC19 DNA (30  $\mu$ M, 0.20  $\mu$ g  $\mu$ L<sup>-1</sup>) incubated with complexes **2** and controls in 50 mM Tris-HCl/NaCl buffer (pH, 7.2) at 37 °C for 2 h on irradiation with UV-A light of 365 nm (6 W) for 1 h: lane 1, DNA control; lane 2, DNA + HTTA (60  $\mu$ M); lane 3, DNA + Anpp (60  $\mu$ M); lane 4, DNA + Pypp (60  $\mu$ M); lane 5, TbCl<sub>3</sub>· xH<sub>2</sub>O control (60  $\mu$ M); lane 6, DNA + **2** (60  $\mu$ M); Lane 7, DNA + **2** (60  $\mu$ M) + DMSO (4  $\mu$ L); Lane 8, DNA + **2**(60  $\mu$ M) + KI (400  $\mu$ M); Lane 9, DNA + **2** (60  $\mu$ M) + NaN<sub>3</sub> (400  $\mu$ M); Lane 10, DNA + **2** (60  $\mu$ M) + L-Histidine (400  $\mu$ M); Lane 11, DNA + **2** (60  $\mu$ M) + D<sub>2</sub>O (16  $\mu$ L); Lane 12, DNA + catalase (4 unit) + **2** (60  $\mu$ M).

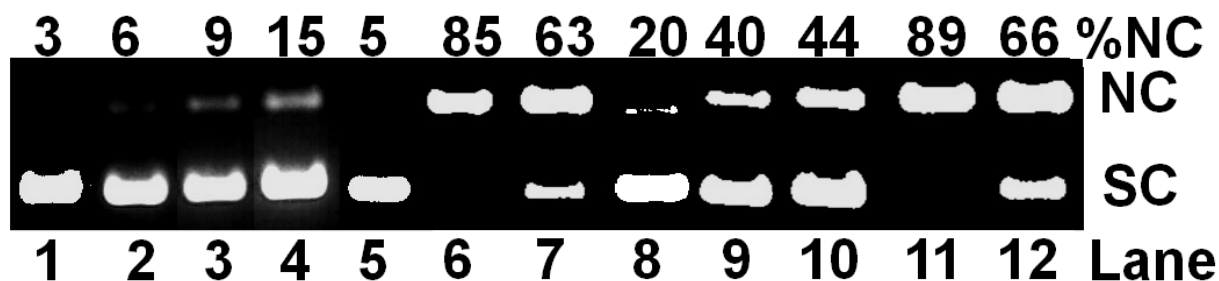

**Figure S24.** Gel electrophoresis diagram showing the cleavage of SC pUC19 DNA ( $30 \mu\text{M}$ ,  $0.20 \mu\text{g } \mu\text{L}^{-1}$ ) incubated with complexes **3** and controls in 50 mM Tris-HCl/NaCl buffer (pH, 7.2) at  $37^\circ\text{C}$  for 2 h on irradiation with UV-A light of 365 nm (6 W) for 1 h: lane 1, DNA control; lane 2, DNA + HTTA ( $60 \mu\text{M}$ ); lane 3, DNA + Anpp ( $60 \mu\text{M}$ ); lane 4, DNA + Pypp ( $60 \mu\text{M}$ ); lane 5,  $\text{EuCl}_3 \cdot x\text{H}_2\text{O}$  control ( $60 \mu\text{M}$ ); lane 6, DNA + **3** ( $60 \mu\text{M}$ ); Lane 7, DNA + **3** ( $60 \mu\text{M}$ ) + DMSO ( $4 \mu\text{L}$ ); Lane 8, DNA + **3** ( $60 \mu\text{M}$ ) + KI ( $400 \mu\text{M}$ ); Lane 9, DNA + **3** ( $60 \mu\text{M}$ ) +  $\text{NaN}_3$  ( $400 \mu\text{M}$ ); Lane 10, DNA + **3** ( $60 \mu\text{M}$ ) + L-Histidine ( $400 \mu\text{M}$ ); Lane 11, DNA + **3** ( $60 \mu\text{M}$ ) +  $\text{D}_2\text{O}$  ( $16 \mu\text{L}$ ); Lane 12, DNA + catalase (4 unit) + **3** ( $60 \mu\text{M}$ ).



**Figure S25.** Gel electrophoresis diagram showing the cleavage of SC pUC19 DNA (30  $\mu$ M, 0.20  $\mu$ g  $\mu$ L<sup>-1</sup>) incubated with complexes **2** and controls in 50 mM Tris-HCl/NaCl buffer (pH, 7.2) at 37 °C for 2 h on irradiation with UV-A light of 365 nm (6 W) for 1 h: lane 1, DNA control; lane 2, DNA + HTTA (60  $\mu$ M); lane 3, DNA + Anpp (60  $\mu$ M); lane 4, DNA + Pypp (60  $\mu$ M); lane 5, TbCl<sub>3</sub>· xH<sub>2</sub>O control (60  $\mu$ M); lane 6, DNA + **4** (60  $\mu$ M); Lane 7, DNA + **4** (60  $\mu$ M) + DMSO (4  $\mu$ L); Lane 8, DNA + **4** (60  $\mu$ M) + KI (400  $\mu$ M); Lane 9, DNA + **4** (60  $\mu$ M) + NaN<sub>3</sub> (400  $\mu$ M); Lane 10, DNA + **4** (60  $\mu$ M) + L-Histidine (400  $\mu$ M); Lane 11, DNA + **4** (60  $\mu$ M) + D<sub>2</sub>O (16  $\mu$ L); Lane 12, DNA + catalase (4 unit) + **4** (60  $\mu$ M).

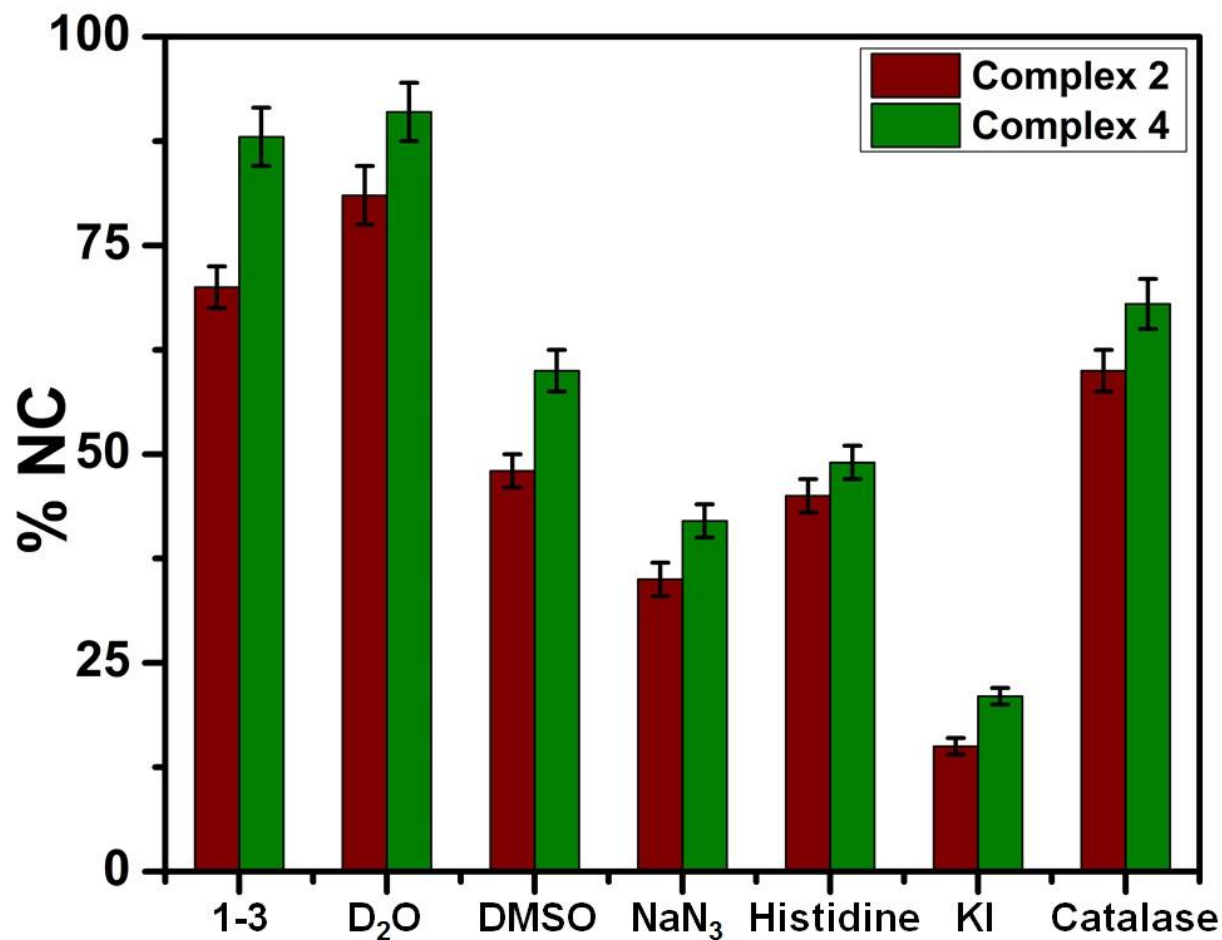

**Figure S26.** Cleavage of SC pUC19 DNA (30  $\mu$ M, 0.2  $\mu$ g) by complexes **2** and **4** (60  $\mu$ M) (Wine) and (Olive) on photo-exposure at 365 nm (6 W) for 1.5 h in the presence of various additives in Tris-HCl/NaCl buffer. NaN<sub>3</sub>, 0.4 mM; KI, 0.4 mM; D<sub>2</sub>O, 16  $\mu$ L; L-histidine, 0.4 mM; DMSO, 4  $\mu$ L; catalase, 4 U.

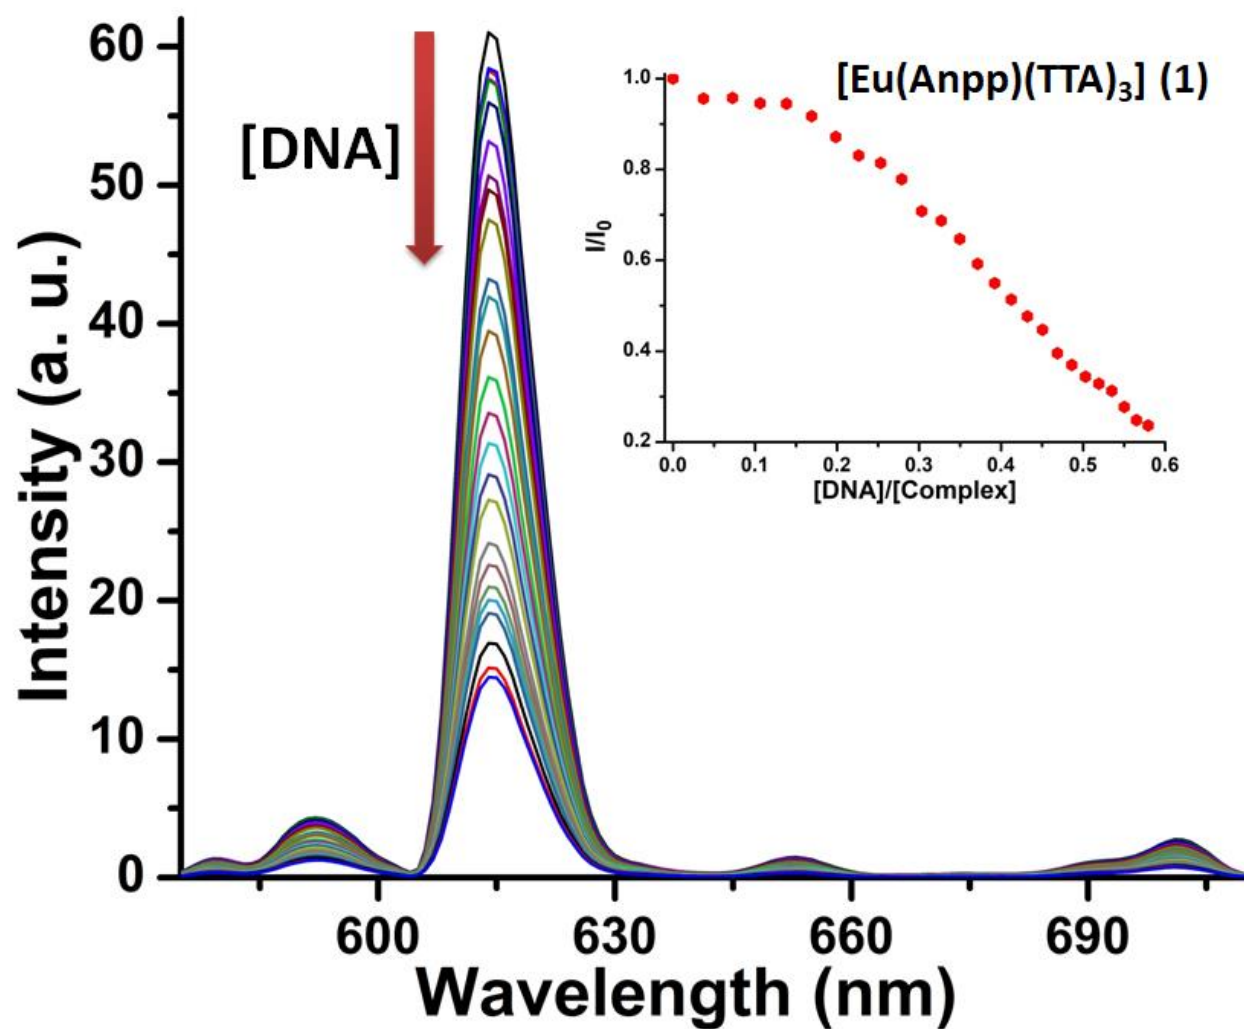

**Figure S27.** Time delayed luminescence spectra of  $[\text{Eu}(\text{Anpp})(\text{TTA})_3] \text{ (1)}$  showing quenching of luminescence intensity with increasing the concentration of CT-DNA in 5 mM Tris buffer (pH=7.2) at 298 K [delay time = gate time = 0.1 ms,  $\lambda_{\text{ex}} = 340$  nm, slit width = 5 nm].
